# Supplementary material
Source: ML conference proceedings conference paper supplement (https://openreview.net/forum?id=TT66Tpbus3b)
Supplement: supplementary_material [file attachment]

## A POTENTIAL NEGATIVE SOCIETAL IMPACTS

The meta-training is the most demanding computational step, thus it can incur in high energy consumption. Additionally, *DeepPipe* does not handle fairness, so it may find pipelines that are biased by the data.

## B LICENCE CLARIFICATION

The results of this work (code, data) are under license BSD-3-Clause license. Both PMF dataset Sheth (2018) and Tensor-OBOE dataset Akimoto & Yang (2020) hold the same license.

## C DISCUSSION ON NUMBER OF EVALUATED PIPELINES

Based on results from Experiment 3, we report the average (and standard deviation) of the number of observed pipelines among all the compared methods in 10 and 60 minutes on Table 3. This is an important metric to understand the optimization overhead introduced by the method. For instance, a method that explores few pipelines during a fixed time window, might use expensive computations during the pipeline optimization.

Table 3: Average Number of Observed Pipelines on OpenML Datasets

| Method          | 10 Mins             | 1 Hour              |
|-----------------|---------------------|---------------------|
| TPOT            | 45.48 $\pm$ 46.25   | 70.56 $\pm$ 41.67   |
| Tensor-OBOE     | 84.43 $\pm$ 57.61   | 178.95 $\pm$ 69.04  |
| OBOE            | 120.35 $\pm$ 70.35  | 467.09 $\pm$ 330.34 |
| SMAC            | 80.76 $\pm$ 115.04  | 452.35 $\pm$ 637.08 |
| PMF             | 126.37 $\pm$ 197.61 | 523.71 $\pm$ 663.07 |
| <i>DeepPipe</i> | 94.51 $\pm$ 128.62  | 356.71 $\pm$ 379.62 |

We notice that *DeepPipe* achieves the best results (see Table 1) by using a reasonable amount of pipelines, i.e. the optimization overhead introduced our method is small compared to other approaches such as TPOT and OBOE.

## D DISCUSSION ON THE INTERACTIONS AMONG COMPONENTS

The encoder and aggregation layers capture interactions among the pipeline components, and therefore are important to attain good performance. These interactions are reflected in the features extracted by these layers, i.e. the pipelines representations obtained by *DeepPipe*. These representations lie on a metric space that captures relevant information about the pipelines and which can be used on the kernel for the Gaussian Process. Using the original input space does not allow to extract rich representations. To test this idea, we meta-train four version of *DeepPipe* with and without encoder and aggregation layers on our TensorOBOE meta-train set and then test on the meta-test split. In Figure 5, we show that the best version is obtained when using both encoder (*Enc.*) and aggregation (*Agg.*) layers (green line), whereas the worst version is obtained when using the original input space, i.e. no encoder and no aggregation layers. Having encoder helps more than not having encoder, thus it is important to capture interactions among hyperparameters in the same stage. As having an aggregation layer is better than not, it is important to capture interactions among components from different stages.

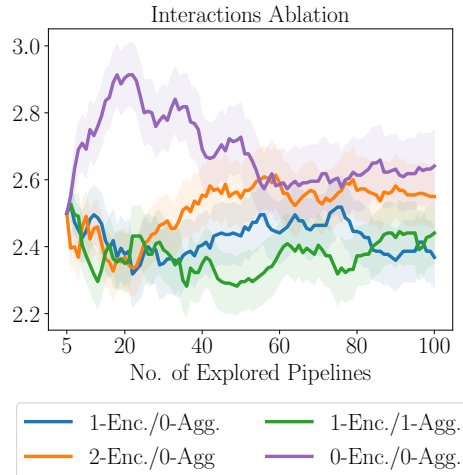

Figure 5: Average rank for *DeepPipe* with and without encoder and aggregation layers.

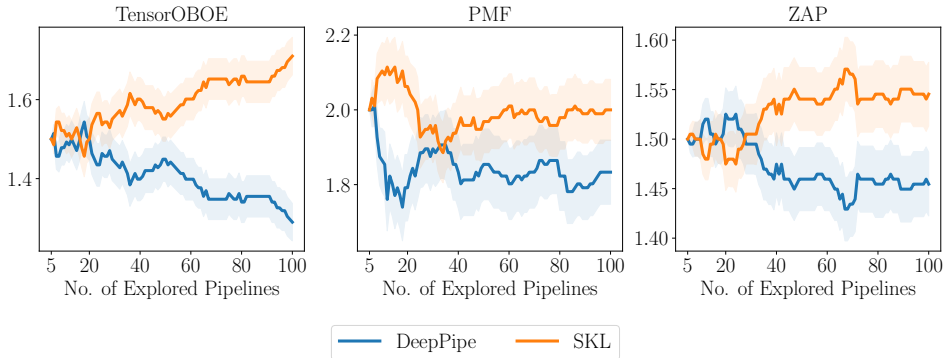

Figure 6: Comparison with Structured Kernel Learning (SKL)

Table 4: Comparison with AutoPrognosis

| $E_{BO}$ | Method    | Avg. Rank | Std. Rank | Avg. Acc. | Std. Acc. | Avg Time | Std. Time |
|----------|-----------|-----------|-----------|-----------|-----------|----------|-----------|
| 50       | AutoProg. | 1.5588    | 0.4416    | 0.8637    | 0.1143    | 19324    | 12934     |
|          | DeepPipe  | 1.4411    | 0.4416    | 0.8692    | 0.1113    | 903      | 1548.     |
| 100      | AutoProg. | 1.5133    | 0.4694    | 0.8715    | 0.0949    | 18502    | 11176     |
|          | DeepPipe  | 1.4866    | 0.4694    | 0.8727    | 0.0972    | 2221     | 5405      |

## E COMPARISON WITH STRUCTURED KERNEL LEARNING (SKL) AND AUTOPROGNOSIS

AutoPrognosis (Alaa & van der Schaar, 2018) uses Structured Kernel Learning (SKL) and meta-learning to account for the interactions among the pipelines components. SKL decomposes the original input space by making up  $N$  group of pipelines components, e.g. Random Forest and SVM in a group separated from Linear Regression and Logistic Regression. The hyperparameters of every group of pipelines components is then passed through a kernel, and then the  $N$  resulting kernels are added. This effectively builds up a kernel with additive structure (Gardner et al., 2017), however they are not using a feature extractor like *DeepPipe*. We compare SKL against a non-pretrained *DeepPipe* on Figure 6 on three meta-datasets, where it is noticeable that our method outperforms this strategy.

Additionally we compare *DeepPipe* with the whole algorithm introduced by AutoPrognosis 2.0 (Imrie et al., 2022) on the Open ML datasets for 50 and 100 BO iterations ( $E_{BO}$ ). We report the average and standard deviation for the rank, accuracy and time. *DeepPipe* achieves the best average rank, ie. lower average rank than AutoPrognosis. This is complemented with the having the highest average accuracy. Interestingly, our method is approximately one order of magnitude faster than AutoPrognosis. We notice this is due to the time overhead introduced by the Gibbs sampling strategy for optimizing the structured kernel, whereas our approach uses gradient-based optimization.

**Experimental Set-Up for *DeepPipe*.** For our comparison with SKL, we use the same hyperparameters and architecture as for the Experiment 1. When comparing with AutoPrognosis, we use the same hyperparameters and architecture as for the Experiment 2, pre-trained on the Tensor-OBOE meta-train split.

**Experimental Set-Up for SKL and AutoPrognosis** For SKL we used the default strategy with  $N = 3$  (Alaa & van der Schaar, 2018). For AutoPrognosis, we use the implementation in the respective author’s repository<sup>3</sup>. We ran it with the default configuration, but limited the search space of classifiers to match the classifiers on the Tensor-OBOE meta-dataset<sup>4</sup>.

<sup>3</sup><https://github.com/ahmedmalaa/AutoPrognosis>

<sup>4</sup>Specifically, the list of classifiers is: Random Forest, Extra Tree Classifier, Gradient Boosting", Logist Regression, MLP, linear SVM, kNN, Decision Trees, Adaboost, Bernoulli Naive Bayes, Gaussian Naive Bayes, Perceptron.

## F DISCUSSION ON THE INDUCTIVE BIAS VS. PRE-TRAINING EFFECT

How shallow/deep should the encoder networks be compared to the aggregation network? We hypothesize that deeper encoders help in the transfer-learning setup where there exist only a few evaluated pipeline configurations on past datasets. To test this hypothesis, we assess the performance of *DeepPipe* with different network sizes and meta-trained with different percentages of meta-training tasks: 0.5%, 1%, 5%, 10%, 50%, and 100%. As we use the Tensor-OBOE meta-dataset, this effectively means that we use 1, 3, 16, 33, 165, and 330 tasks respectively.

The results of these experiments are shown in Figure 7. Here we ablate *DeepPipe* with different numbers of encoder layers while pre-training on different fractions of the meta-training tasks. We ran the experiment for three values of  $F$ . The presented scores are the average ranks among the three *DeepPipe* configurations (row-wise). The average rank is computed across all the meta-test tasks and across 100 BO iterations. The results indicate that deeper encoders achieve a better performance when a small number of meta-training tasks is available. In contrast, shallower encoders are needed if more meta-training tasks are available. Apparently the deep aggregation layers  $\phi$  already capture the interaction between the hyperparameter configurations across algorithms when a large meta-dataset of evaluated pipelines is given. The smaller the meta-data of evaluated pipeline configurations, the more inductive bias we need to implant in the form of per-algorithm encoders.

|                             | F=4  |      |      | F=6  |      |      | F=8  |      |      |
|-----------------------------|------|------|------|------|------|------|------|------|------|
| Fraction of Meta-Train Data | 0    | 1    | 2    | 0    | 1    | 2    | 0    | 1    | 2    |
| 0.5%                        | 2.05 | 2.08 | 1.88 | 2.0  | 1.89 | 2.1  | 2.12 | 2.02 | 1.86 |
| 1%                          | 1.96 | 2.18 | 1.86 | 2.11 | 1.9  | 1.99 | 2.08 | 1.91 | 2.01 |
| 5%                          | 1.88 | 2.02 | 2.09 | 2.01 | 1.95 | 2.04 | 1.98 | 2.07 | 1.96 |
| 10%                         | 1.91 | 2.03 | 2.06 | 1.87 | 2.07 | 2.06 | 1.91 | 1.93 | 2.16 |
| 50%                         | 1.9  | 2.06 | 2.04 | 1.94 | 2.03 | 2.03 | 1.87 | 2.1  | 2.04 |
| 100%                        | 1.81 | 2.1  | 2.09 | 1.89 | 1.98 | 2.13 | 1.86 | 2.16 | 1.98 |

Figure 7: Comparison of the average rank for *DeepPipe* with different number of encoders under different percentages of meta-train data. The total number of layers is always the same.

## G ADDITIONAL INFORMATION ON EXPERIMENTAL SET-UP

In all experiments (except Experiment 1), we meta-train the surrogate following Algorithm 1 in Appendix J for 10000 epochs with the Adam optimizer and a learning rate of  $10^{-4}$ , batch size 1000, and the Matérn Kernel. During meta-testing, when we perform BO to search for a pipeline, we fine-tune only the kernel parameters  $\gamma$  for 100 gradient steps. In the non-transfer experiments (Experiment 1) we use an architecture with  $F = 8$  and fine-tuned the network for 10000 iterations. The rest of the training settings are similar to the transfer experiments. In Experiment 5 we fine-tune the whole network for 100 steps when no encoders are used. Otherwise, we fine-tune only the encoder associated with the omitted estimator and freeze the rest of the network. We ran all experiments on a CPU cluster, where each node contains two Intel Xeon E5-2630v4 CPUs with 20 CPU cores each, running at 2.2 GHz. We reserved a total maximum memory of 16GB. We discuss how we implemented *DeepPipe* efficiently as a MLP with masked layers<sup>5</sup> in Appendix N. We associate algorithms with no hyperparameters to the same encoder. We found that adding the One-Hot-Encoding of the selected algorithms per stage as an additional input is helpful. Therefore, the input dimensionality of the aggregated layers is equal to the dimension after concatenating the encoders output  $F \cdot \sum_i (Q_i + M_i)$ . Further details on the architectures for each search space are specified in Appendix M. Finally, we use the Expected Improvement as acquisition function for *DeepPipe* and all the baselines.

**Initial Configurations** For the experiments with the PMF-Dataset, we choose these configurations with the same procedure as the authors Fusi et al. (2018), where they use dataset meta-features to find the most similar auxiliary task to initialize the search on the test task. Since we do not have meta-features for the Tensor-OBOE meta-dataset, we follow a greedy initialization approach Metz et al. (2020). This was also applied to the ZAP-Dataset. Specifically, we select the best-performing

<sup>5</sup>We make our code available in <https://anonymous.4open.science/r/DeepPipe-E19E>

pipeline configuration by ranking their performances on the meta-training tasks. Subsequently, we iteratively choose four additional configurations that minimize  $\sum_{t \in \text{Tasks}} \hat{r}_t$ , where  $\hat{r}_t = \min_{p \in \mathcal{X}} r_{t,p}$ , given that  $r_{t,p}$  is the rank of the pipeline  $p$  on task  $t$ .

## H ADDITIONAL RELATED WORK

**Hyperparameter Optimization (HPO)** has been well studied over the past decade (Bergstra & Bengio, 2012). Techniques relying on Bayesian Optimization (BO) employ surrogates to approximate the response function of Machine Learning models, such as Gaussian Processes (Snoek et al., 2012), Random Forests (Bergstra et al., 2011) or Bayesian Neural Networks (Snoek et al., 2015; Springenberg et al., 2016). Further improvements have been achieved by applying transfer learning, where existing evaluations on auxiliary tasks help pre-training or meta-learning the surrogate. In this sense, some approaches use pre-trained neural networks with uncertainty outputs (Wistuba & Grabocka, 2021; Perrone et al., 2018; Wei et al., 2021b), or ensembles of Gaussian Processes (Feurer et al., 2018).

**Deep Kernels** propose combining the benefits of stochastic processes such as Gaussian Processes with neural networks (Calandra et al., 2016; Garnelo et al., 2018; Wilson et al., 2016). Follow-up work has applied this combination for training few-shot classifiers (Patacchiola et al., 2020). In the area of Hyperparameter Optimization, (Snoek et al., 2015) achieved success on BO by modeling the output layer of a deep neural network with a Bayesian linear regression. Perrone et al. (2018) extended this work by pre-training the Bayesian network with auxiliary tasks. Recent work proposed to use non-linear kernels, such as the Matérn kernel, on top of the pre-trained network to improve the performance of BO (Wistuba & Grabocka, 2021; Wei et al., 2021a).

## I BAYESIAN OPTIMIZATION (BO)

In BO we fit a surrogate iteratively using the observed configurations and their response. Posteriorly, its probabilistic output is used to query the next configuration to evaluate (observe) by maximizing an acquisition function. A common choice for the acquisition is Expected Improvement, defined as:

$$\text{EI}(p_\lambda | \mathcal{H}) = \mathbb{E} [\max \{\mu(p_\lambda) - y_{\max}, 0\}] \quad (6)$$

where  $y_{\max}$  is the largest observed response in the history  $\mathcal{H}$  and  $\mu$  is the posterior of the mean predicted performance given by the surrogate, computed using Equation 2. A common choice as surrogate is Gaussian Process, but for Pipeline Optimization we introduce *DeepPipe*.

## J *DeepPipe* META-TRAINING

Given a task  $t$  with observations  $\mathcal{H}_t = \{(p_\lambda^{(t,1)}, y^{(t,1)}), \dots, (p_\lambda^{(t,Q_t)}, y^{(t,Q_t)})\}$ ,  $t \in \{1, \dots, T\}$ , the objective function to minimize can be derived from the negative log marginal likelihood from the Gaussian Process  $p(\mathcal{H}_t) \sim \mathcal{N}(0, K^T)$ , where  $K^{(t)}$  is the covariance matrix induced by *DeepPipe* with parameters  $\theta, \gamma$ . Specifically, the negative log marginal likelihood is (Rasmussen & Williams, 2006):

$$-\log p(\mathcal{H}_t) = -\log \mathcal{N}(0, K^{(t)}) = y^{(t)\top} K^{(t)}(\theta, \gamma)^{-1} y^{(t)} + \log |K^{(t)}(\theta, \gamma)| \quad (7)$$

The Equation 5 is the multi-task objective function that involves all the meta-learning tasks with indices  $t \in \{1, \dots, T\}$ .

We use auxiliary tasks to learn a good initialization for the surrogate. We sample batches from the meta-training tasks, and make gradient steps that maximize the marginal log-likelihood in Equation 5, similar to previous work (Wistuba & Grabocka, 2021). The training algorithm for the surrogate is detailed in Algorithm 1. Additionally, we apply Early Convergence by monitoring the performance on the validation meta-dataset. Every epoch, we perform the following operations for every task  $t \in 1 \dots T$ : *i*) Draw a set of  $b$  observations (pipeline configuration and performance), *ii*) Compute the negative log marginal likelihood (our loss function) as in Equation 7, *iii*) compute gradient of the loss with respect to the *DeepPipe* parameters and *iv*) updated *DeepPipe* parameters.

**Algorithm 1:** *DeepPipe* Meta-Training

---

**Input:** Learning rates  $\eta$ , meta-training data with  $T$  tasks  $\mathcal{H} = \bigcup_{t=1..T} \mathcal{H}^{(t)}$ , number of epochs  $E$ , batch size  $b$

**Output:** Parameters  $\mathbf{w}$  and  $\theta$

```

1 Initialize  $\mathbf{w}$  and  $\theta$  at random;
2 for  $E$  times do
3   for  $t \in \{1, \dots, T\}$  do
4     Sample batch  $\mathcal{B} = \{(p_{\lambda}^{(t,i)}, y^{(t,i)})\}_{i=1, \dots, b} \sim \mathcal{H}^{(t)}$ ;
5     Compute negative log-likelihood  $\mathcal{L}$  on  $\mathcal{B}$ . (Objective Function in Equation 5);
6      $\theta^{\text{agg}} \leftarrow \theta^{\text{agg}} - \eta \nabla_{\theta^{\text{agg}}} \mathcal{L}$ ;
7      $\theta^{\text{enc}} \leftarrow \theta^{\text{enc}} - \eta \nabla_{\theta^{\text{enc}}} \mathcal{L}$ ;
8      $\gamma \leftarrow \gamma - \eta \nabla_{\gamma} \mathcal{L}$ ;
9   end
10 end

```

---

**Algorithm 2:** Bayesian Optimization (BO) with *DeepPipe*


---

**Input:** Learning rate  $\eta$ , initial observations  $\mathcal{H} = \{(p_{\lambda}^{(i)}, y^{(i)})\}_{i=1, \dots, I}$ , pretrained surrogate with parameters  $\theta$  and  $\gamma$ , number of surrogate updates  $E_{\text{Test}}$ , BO iterations  $E_{\text{BO}}$ , search space of pipelines  $\mathcal{P}$

**Output:** Pipeline Configuration  $p_{\lambda}^*$

```

1 Function FineTune( $\mathcal{H}, \gamma, \eta, E_{\text{test}}$ ):
2   for  $E_{\text{Test}}$  times do
3     Compute negative log-likelihood  $\mathcal{L}$  on  $\mathcal{D}$ . (Objective function in Equation 5 with  $T = 1$ );
4      $\gamma \leftarrow \gamma - \eta \nabla_{\gamma} \mathcal{L}$ ;
5   end
6   return  $\gamma$ 
7 Function BO( $\mathcal{H}, \eta, \theta, \gamma, E_{\text{test}}, E_{\text{BO}}$ ):
8   for  $E_{\text{BO}}$  times do
9      $\gamma' \leftarrow \text{FineTune}(\mathcal{H}, \gamma, \eta, E_{\text{test}})$ ;
10    Compute  $p'_{\lambda} \in \arg \max_{p_{\lambda} \in \mathcal{P}} \text{EI}(p_{\lambda}, \gamma', \theta)$ ;
11    Observe performance  $y'$  of pipeline  $p'_{\lambda}$ ;
12    Add new observation  $\mathcal{H} \leftarrow \mathcal{H} \cup \{(p'_{\lambda}, y')\}$ ;
13  end
14  Compute best pipeline index  $i_* \in \arg \max_{i \in \{1 \dots |\mathcal{H}|\}} y_i$ ;
15  return  $p_{\lambda}^{(i_*)}$ ;

```

---

**K** *DeepPipe* META-TESTING

When a new pipeline is to be optimized on a new dataset (task), we apply BO (see Algorithm 2). Every iteration we update the surrogate by fine-tuning the kernel parameters. However, the parameters of the MLP layers  $\theta$  can be also optimized, as we did on the Experiment 1, in which case the parameters were randomly initialized.

**L** ADDITIONAL RESULTS

In this section, we present further results. Firstly, we show an ablation of the factor that determines the number of hidden units ( $F$ ) in Figure 8. It shows that  $F = 8$  attains the best performance after exploring 100 pipelines in both datasets. Additionally, we present the average regret for the ablation of  $F$ , and the results of Experiment 1 and 2 in Figures 9, 10 and 11 respectively.

Table 5 present the extended results of omitting estimators in the PMF Dataset. From these, we draw the same conclusion as in the same paper: having encoders help to obtain better performance when a new algorithm is added to a pipeline.

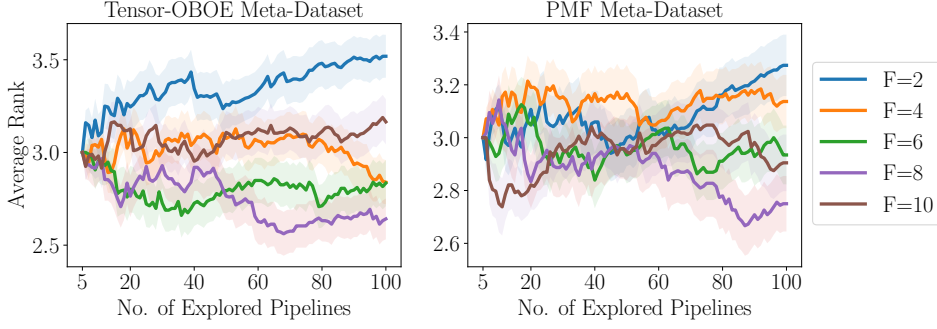Figure 8: Comparison of different  $F$  values in *DeepPipe* (Rank).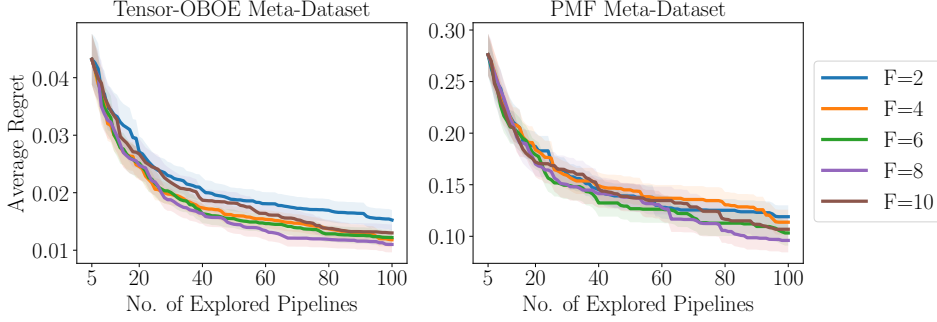Figure 9: Comparison of different  $F$  values in *DeepPipe* (Regret).Table 5: Average rank among *DeepPipe* variants for newly-added algorithms (PMF)

| Enc. | MTd. | Omitted in |      | Omitted Estimator |               |               |               |               |               |               |               |
|------|------|------------|------|-------------------|---------------|---------------|---------------|---------------|---------------|---------------|---------------|
|      |      | MTTr.      | MTe. | ET                | RF            | XGBT          | KNN           | GB            | DT            | Q/LDA         | NB            |
| ✓    | ✓    | ✓          | ✓    | 3.1527            | 3.1645        | 3.2109        | 3.2541        | 3.2874        | 3.2741        | 3.1911        | 3.0263        |
| ✓    | ✗    | ✓          | ✗    | 3.2462            | 3.3208        | 3.2592        | 3.3180        | 3.2376        | 3.2249        | 3.3557        | 3.3993        |
| ✓    | ✓    | ✗          | ✗    | <u>2.5710</u>     | <u>2.5996</u> | <u>2.4011</u> | <u>2.5947</u> | <u>2.6301</u> | <u>2.5664</u> | <u>2.6252</u> | <u>2.6214</u> |
| ✗    | ✓    | ✓          | ✗    | 3.0464            | <b>2.8550</b> | 3.0850        | <b>2.8845</b> | 2.9397        | 3.0316        | 2.9530        | 3.0596        |
| ✓    | ✓    | ✓          | ✗    | <b>2.9838</b>     | 3.0601        | <b>3.0439</b> | 2.9486        | <b>2.9051</b> | <b>2.9029</b> | <b>2.8750</b> | <b>2.8934</b> |

We carry out an ablation to understand the difference between the versions of Deep Pipe with/without encoder and with/without transfer-learning using ZAP Meta-dataset. As shown in Figure 12, the version with transfer learning and one encoder performs the best, thus, highlighting the importance of encoders in transfer learning our *DeepPipe* surrogate.

## M ARCHITECTURE DETAILS

The input to the kernel has a dimensionality of  $Z=20$ . We fix it, to be the same as the output dimension for PMFs. The number of neurons per layer, as mentioned in the main paper, depends on  $F$ . Consider an architecture with with no encoder layers and  $\ell_a$  aggregation layers, and hyperparameters  $\Lambda_{i,j}, i \in \{1 \dots N\}, j \in \{1 \dots M_i\}$  (following the notation in section 4.1) with  $Q_i = \max_j |\Lambda_{i,j}|$ , then the number of weights (omitting biases for the sake of simplicity) will be:

$$\left( \sum_{i,j} |\Lambda_{i,j}| \right) \cdot \left( F \cdot \sum_i Q_i \right) + (\ell_a - 1) \left( F \cdot \sum_i Q_i \right)^2 \quad (8)$$

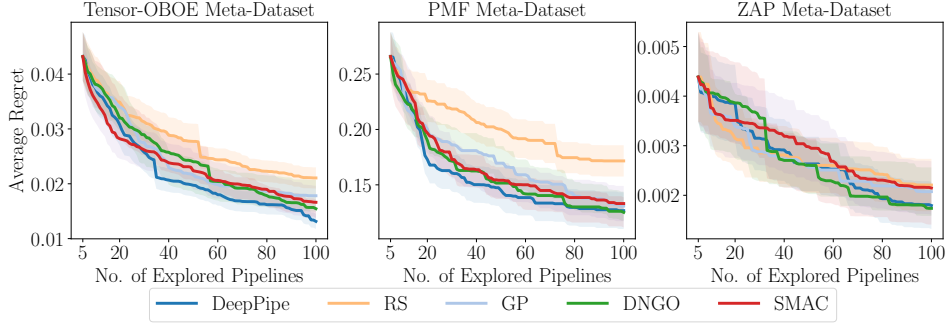Figure 10: Comparison of *DeepPipe* vs. non transfer-learning PO methods in Experiment 1 (Regret)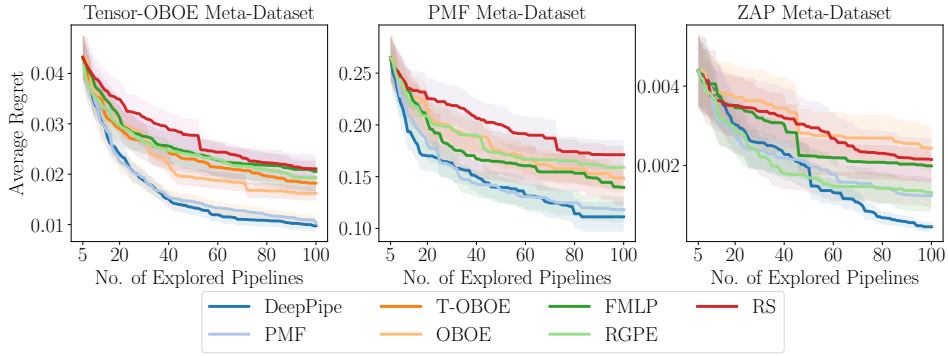Figure 11: Comparison of Regret in *DeepPipe* vs. transfer-learning PO methods in Experiment 2 (Regret)

If the architecture has  $\ell_e$  encoder layers and  $\ell_a$  aggregation layers, then number of weights is given by:

$$\sum_{i,j} |\Lambda_{i,j}| \cdot (F \cdot Q_i) + (\ell_e - 1) \sum_i M_i \cdot (F \cdot Q_i)^2 + \ell_a \left( F \cdot \sum_i Q_i \right)^2 \quad (9)$$

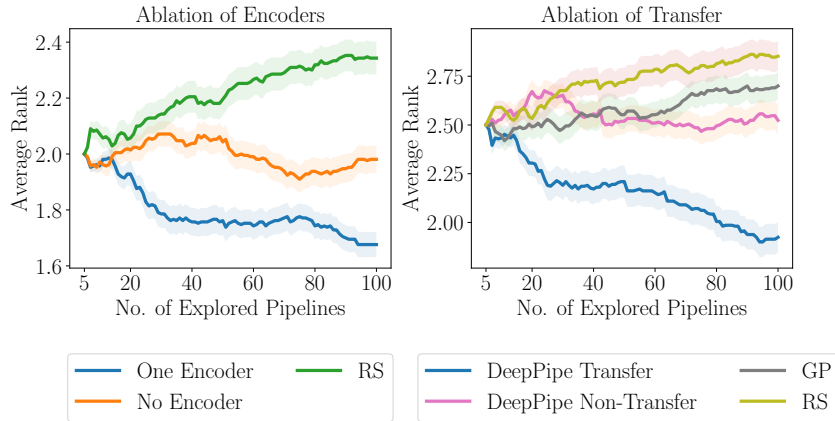

Figure 12: Ablations on the ZAP meta-dataset



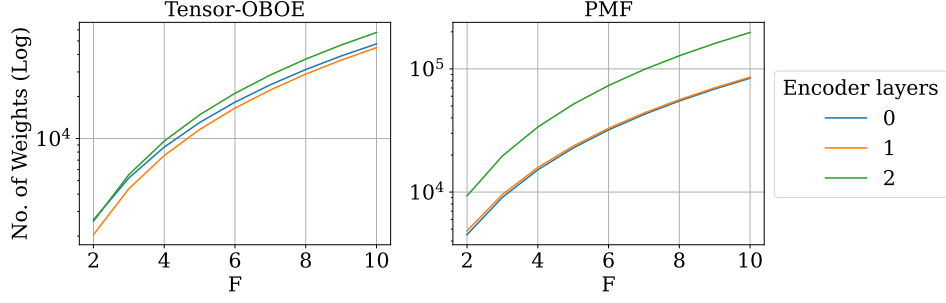Figure 13: Number of weights in the MLP for a given value of  $F$  and encoder layers.

In other words, the aggregation layers have  $F \cdot \sum_i Q_i$  hidden neurons, whereas every encoder from the  $i$ -th stage has  $F \cdot Q_i$  neurons per layer. The input sizes are  $\sum_{i,j} |\Lambda_{i,j}|$  and  $|\Lambda_{i,j}|$  for both cases respectively. The specific values for  $|\Lambda_{i,j}|$  and  $Q_i$  per search space are specified in Appendix R.

In the search space for PMF, we group the algorithms related to Naive Bayers (MultinomialNB, BernoulliNB, GaussianNB) in a single encoder. In this search space, we also group LDA and QDA. In the search space of TensorOboe, we group GaussianNB and Perceptron as they do not have hyperparameters. Given these considerations, we can compute the input size and the weights per search space as function of  $\ell_a, \ell_e, F$  as follows:

(i) Input size:

$$\begin{aligned}
 \# \text{ Input size (PMF)} &= \sum_{i,j} |\Lambda_{i,j}| = 72 \\
 \# \text{ Input (TensorOboe)} &= \sum_{i,j} |\Lambda_{i,j}| = 37 \\
 \# \text{ Input (ZAP)} &= \sum_{i,j} |\Lambda_{i,j}| = 35
 \end{aligned} \tag{10}$$

(ii) Number of weights for architecture without encoder layers:

$$\begin{aligned}
 \# \text{ Weights (PMF)} &= 720 \cdot F + 256 \cdot (\ell_a - 1) \cdot F^2 \\
 \# \text{ Weights (TensorOboe)} &= 444 \cdot F + 144 \cdot (\ell_a - 1) \cdot F^2 \\
 \# \text{ Weights (ZAP)} &= 1085 \cdot F + 961 \cdot (\ell_a - 1) \cdot F^2
 \end{aligned} \tag{11}$$

(iii) Number of weights for architecture with encoder layers:

$$\begin{aligned}
 \# \text{ Weights (PMF)} &= 886 \cdot F + (1376 \cdot (\ell_e - 1) + 256 \cdot \ell_a) \cdot F^2 \\
 \# \text{ Weights (TensorOboe)} &= 161 \cdot F + (271 \cdot (\ell_e - 1) + 144 \cdot \ell_a) \cdot F^2 \\
 \# \text{ Weights (ZAP)} &= 35 \cdot F + (965 \cdot (\ell_e - 1) + 961 \cdot \ell_a) \cdot F^2
 \end{aligned} \tag{12}$$

According to the previous formulations, Figure 13 shows how many parameters (only weights) the MLP has given a specific value of  $F$  and of encoder layers. We fix the total number of layers to four. Notice that the difference in the number of parameters between an architecture with 1 and 2 encoder layers is small in both search spaces.

## N COMPUTATIONAL IMPLEMENTATION

*DeepPipe*'s architecture (encoder layers + aggregated layers) can be formulated as a Multilayer Perceptron (MLP) comprising three parts (Figure 14). The first part of the network that builds the



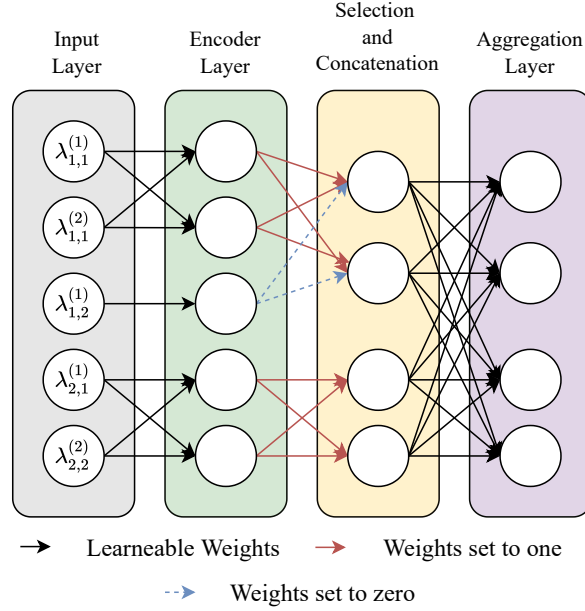

Figure 14: Example of the Implementation of *DeepPipe* as MLP.  $\lambda_{i,j}^{(k)}$  indicates the  $k$ -th hyperparameter of the  $j$ -th algorithm in the  $i$ -th stage. In this architecture, the first stage has two algorithms, thus two encoders. The algorithm 1 is active for stage 1. The second stage has only one algorithm.

layers with encoders is implemented as a layer with masked weights. We connect the input values corresponding to the hyperparameters  $\lambda_{(i,j)}$  of the  $j$ -th algorithm of the  $i$ -th stage to a fraction of the neurons in the following layer, what builds the encoder. The fraction of neurons, as explained in section 5.4 is  $F \cdot \max_j |\lambda_{(i,j)}|$ . The rest of the connections are dropped. The second part is a layer that selects the output of the encoders associated with the active algorithms (one per stage), and concatenates their outputs (*Selection & Concatenation*). The layer’s connections are fixed to be either to one or zero during forward and backward pass. Specifically, they are one if they are connecting outputs of encoders of active algorithms, and zero otherwise. The last part, an *aggregation layer*, is a fully connected layer that learn interactions between the concatenated output of the encoders. By implementing the architecture as a MLP instead of a multiplexed list of nodes (e.g. with a module list in PyTorch), faster forward and backward passes are obtained. We only need to specify the selected algorithms in the forward-pass so that the weights in the *Encoder Layer* are masked and the ones in the *Selection & Concatenation* are accordingly set. After this implementation, notice that *DeepPipe* is a MLP with **sparse** connections.

## O VISUALIZING THE LEARNT REPRESENTATIONS

We train a *DeepPipe* with 2-layer encoders, 2 aggregation layers, 20 output size and  $F = 8$ . To visualize the pipelines embeddings, we apply TSNE (T-distributed Stochastic Neighbor Embedding). As plotted in Figure 15, the pipelines with the same estimator and dimensionality reducer are creating clusters. The groups in this latent space are also indicators of the performance on a specific task. In Figure 16 we show the same embeddings of the pipelines with a color marker indicating its accuracy on two meta-testing tasks. Top-performing pipelines (yellow color) are relatively close to each other in both tasks, building up regions of good performing pipelines. These groups of good pipelines are different in both cases, which indicates that there is not a single pipeline that works for all tasks. *DeepPipe* maps the pipelines to an embedding space where it is easier to assess the similarity between pipelines and to search for good-performing pipelines. However, the type of pipeline (good performing pipelines, bad performing pipelines) depends on the task.

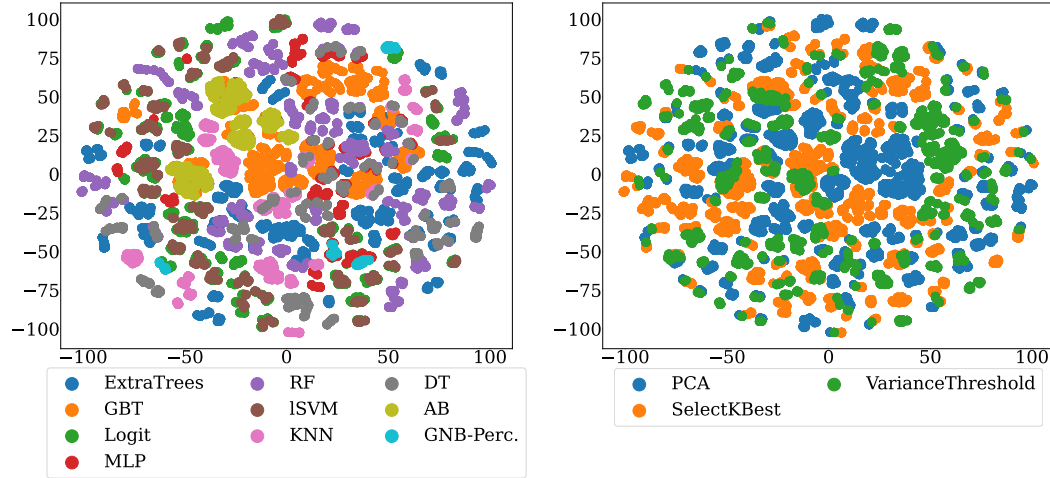

Figure 15: Learnt representations in 2 dimensions for estimators (left) and dimensionality reducers (right) from the Tensor-OBOE meta-dataset.

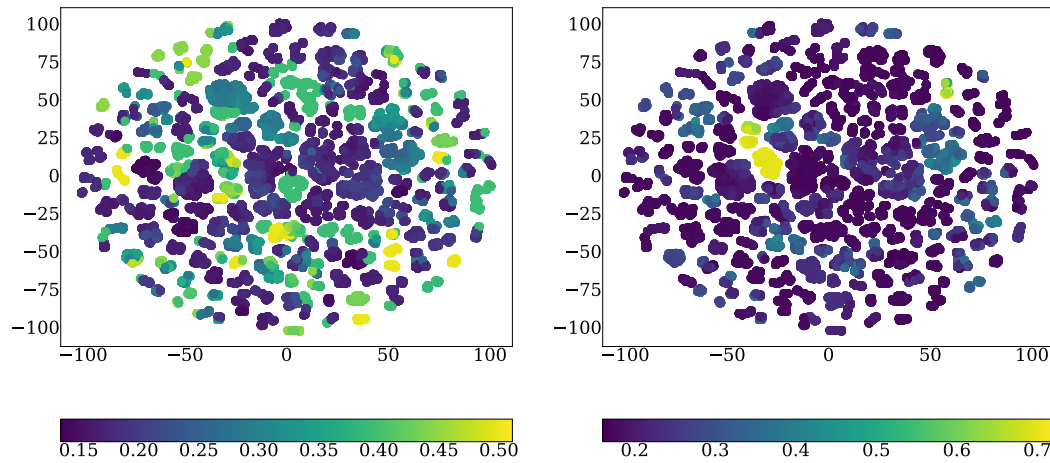

Figure 16: Learnt representations for two tasks with different accuracy levels.

## P META-DATASET PREPROCESSING

We obtained the raw data for the meta-datasets from the raw repositories of PMF<sup>6</sup> and TensorOBOE<sup>7</sup>. PMF repo provides an accuracy matrix, while Tensor-OBOE specifies the error. We take the pipelines' configurations and concatenate the hyperparameters in both meta-datasets. Then we proceed with the following steps: 1) One-Hot encode the categorical hyperparameters, 2) apply a log transformation  $x_{new} = \ln(x)$  to the hyperparameters whose value is greater than 3 standard deviations, 3) scale all the values to be in the range [0,1]. The variables coming from categorical hyperparameters are named *original-variable-name\_category*.

## Q ABBREVIATIONS

(i) Abbreviations in Table 2:

1) ET: ExtraTrees, 2) GBT: Gradient Boosting, 3) Logit: Logistic Regression 4) MLP: Multilayer Perceptron 5) RF: Random Forest, 6) LSVM: Linear Support Vector Machine, 7) kNN: k Nearest Neighbours, 8) DT: Decision Trees, 9) AB: AdaBoost, 10) GB/PE= Gaussian Naive Bayes/Perceptron.

(ii) Abbreviations in Table 3:

1) ET: ExtraTrees, 2) RF: Random Forest, 3) XGBT: Extreme Gradient Boosting, 4) kNN: K-Nearest Neighbours, 5) GB: Gradient Boosting, 6) DT: Decision Trees, 7) Q/LDA: Quadratic Discriminant Analysis/ Linear Discriminant Analysis, 8) NB: Naive Bayes.

## R META-DATASET SEARCH SPACES

We detail the search spaces composition in Tables 6 and 7. We specify the stages, algorithms, hyperparameters, number of components per stage  $M_i$ , the number of hyperparameters per algorithm  $|\lambda_{i,j}|$ , and the maximum number of hyperparameters found in an algorithm per stage  $Q_i$ . For the ZAP meta-dataset, we defined a pipeline with two stages: (i) *Architecture*, which specifies the type or architecture used (i.e. ResNet18, EfficientNet-B0, EfficientNet-B1, EfficientNet-B2), and (ii) *Optimization-related Hyperparameters* that are shared by all the architectures.

<sup>6</sup><https://github.com/rsheth80/pmf-automl>

<sup>7</sup><https://github.com/udellgroup/oboe/tree/master/oboe/defaults/TensorOboe>

Table 6: Search Space for PMF Meta-Dataset

| Stage        | $Q_i$ | $M_i$ | Algorithm         | $ \Lambda_{i,j} $ | Hyperparameters                                                                                                                                                                       |
|--------------|-------|-------|-------------------|-------------------|---------------------------------------------------------------------------------------------------------------------------------------------------------------------------------------|
| Preprocessor | 3     | 2     | Polynomial        | 3                 | include_bias, interaction_only, degree                                                                                                                                                |
|              |       |       | PCA               | 2                 | keep_variance, whiten                                                                                                                                                                 |
|              |       |       | ExtraTrees        | 9                 | bootstrap, min_samples_leaf, n_estimators, max_features, min_weight_fraction_leaf, min_samples_split, max_depth                                                                       |
| Estimator    | 13    | 8     | RandomForest      | 10                | bootstrap, min_samples_leaf, n_estimators, max_features, min_weight_fraction_leaf, min_samples_split, max_depth, criterion_entropy, criterion_gini                                    |
|              |       |       | XgradientBoosting | 13                | reg_alpha, col_sample_bytree, colsample_bylevel, scale_pos_weight, learning_rate, max_delta_step, base_score, n_estimators, subsample, reg_lambda, min_child_weight, max_depth, gamma |
|              |       |       | kNN               | 4                 | p, n_neighbors, weights_distance, weights_uniform                                                                                                                                     |
|              |       |       | GradientBoosting  | 10                | max_leaf_nodes, learning_rate, min_samples_leaf, n_estimators, subsample, min_weight_fraction_leaf, max_features, min_samples_split, max_depth, loss_deviance                         |
|              |       |       | DecisionTree      | 9                 | max_leaf_nodes, min_samples_leaf, max_features, min_weight_fraction_leaf, min_samples_split, max_depth, splitter_best, criterion_entropy, criterion_gini                              |
|              |       |       | LDA               | 6                 | shrinkage_factor, n_components, tol, shrinkage_-1, shrinkage_auto, shrinkage_manual                                                                                                   |
|              |       |       | QDA               | 1                 | reg_param                                                                                                                                                                             |
|              |       |       | BernoulliNB       | 2                 | alpha, fit_prior                                                                                                                                                                      |
|              |       |       | MultinomialNB     | 2                 | alpha, fit_prior                                                                                                                                                                      |
|              |       |       | GaussianNB        | 1                 | apply_gaussian_nb                                                                                                                                                                     |

Table 7: Search Space for Tensor-OBOE Meta-Dataset

| Stage        | $Q_i$ | $M_i$ | Algorithm         | $ \Lambda_{i,j} $ | Hyperparameters                                                            |
|--------------|-------|-------|-------------------|-------------------|----------------------------------------------------------------------------|
| Imputer      | 4     | 1     | SimpleImputer     | 4                 | Strategy_constant, Strategy_mean, Strategy_median, Strategy_most_frequent  |
| Encoder      | 1     | 1     | OneHotEncoder     | 1                 | Handle_unknown_ignore                                                      |
| Scaler       | 1     | 1     | StandardScaler    | 1                 | -                                                                          |
| Dim. Reducer | 1     | 3     | PCA               | 1                 | N_components                                                               |
|              |       |       | SelectKBest       | 1                 | K                                                                          |
|              |       |       | VarianceThreshold | 1                 | -                                                                          |
| Estimator    | 5     | 10    | ExtraTrees        | 3                 | min_samples_split, criterion_entropy, criterion_gini                       |
|              |       |       | Gradient Boosting | 4                 | learning_rate, max_depth, max_features_None, max_features_log2             |
|              |       |       | Logit             | 5                 | C, penalty_l1, penalty_l2, solver_liblinear, solver_saga                   |
|              |       |       | MLP               | 5                 | alpha, learning_rate_init, learning_rate_adaptive, solver_adam, solver_sgd |
|              |       |       | Random Forest     | 3                 | min_samples_split, criterion_entropy, criterion_gini                       |
|              |       |       | ISVM              | 1                 | C                                                                          |
|              |       |       | kNN               | 2                 | n_neighbors, p                                                             |
|              |       |       | Decision Trees    | 1                 | min_samples_split                                                          |
|              |       |       | AdaBoost          | 2                 | learning_rate, n_estimators                                                |
|              |       |       | GaussianNB        | 1                 | -                                                                          |
|              |       |       | Perceptron        | 1                 | -                                                                          |

Table 8: Search Space for ZAP Meta-Dataset

| Stage                  | $Q_i$ | $M_i$ | Algorithm       | $ \Lambda_{i,j} $ | Hyperparameters                                                                                                                                                                                                                                                                                                                                                                                                                                                                                                                                                                                                                                                                         |
|------------------------|-------|-------|-----------------|-------------------|-----------------------------------------------------------------------------------------------------------------------------------------------------------------------------------------------------------------------------------------------------------------------------------------------------------------------------------------------------------------------------------------------------------------------------------------------------------------------------------------------------------------------------------------------------------------------------------------------------------------------------------------------------------------------------------------|
| Architecture           | 1     | 4     | ResNet          | 1                 | IsActive                                                                                                                                                                                                                                                                                                                                                                                                                                                                                                                                                                                                                                                                                |
|                        |       |       | EfficientNet-B0 | 1                 | IsActive                                                                                                                                                                                                                                                                                                                                                                                                                                                                                                                                                                                                                                                                                |
|                        |       |       | EfficientNet-B1 | 1                 | IsActive                                                                                                                                                                                                                                                                                                                                                                                                                                                                                                                                                                                                                                                                                |
|                        |       |       | EfficientNet-B2 | 1                 | IsActive                                                                                                                                                                                                                                                                                                                                                                                                                                                                                                                                                                                                                                                                                |
| Common Hyperparameters | 31    | 1     | -               | 31                | early_epoch, first_simple_model,<br>max_inner_loop_ratio,<br>skip_valid_score_threshold, test_after_at_least_seconds,<br>test_after_at_least_seconds_max,<br>test_after_at_least_seconds_step,<br>batch_size, cv_valid_ratio, max_size,<br>max_valid_count, steps_per_epoch,<br>train_info_sample,<br>optimizer.amsgrad, optimizer.freeze_portion, optimizer.lr,<br>optimizer.min_lr, optimizer.momentum, optimizer.nesterov,<br>optimizer.warm_up_epoch,<br>warmup_multiplier, optimizer.wd,<br>simple_model_LR, simple_model_NuSVC, simple_model_RF,<br>simple_model_SVC, optimizer.scheduler_cosine,<br>optimizer.scheduler_plateau,<br>optimizer.type_Adam,<br>optimizer.type_AdamW |

## S THEORETICAL INSIGHT OF HYPOTHESIS 5

Here, we formally demonstrate that the *DeepPipe* with encoder layers is grouping hyperparameters from the same algorithm in the latent space, better than *DeepPipe* without encoders, formulated on Corollary S.4, which is supported by Proposition S.3.

**Lemma S.1.** *Given  $\mathbf{w} \in \mathbb{R}^M$ , a vector of weights with independent and identically distributed components  $w_i \in \{w_1, \dots, w_M\}$  such that  $w_i \sim p(w)$ , the expected value of the square of the norm  $\mathbb{E}_{p(w)}(\|\mathbf{w}\|^2)$  is given by  $M \cdot (\mu_w^2 + \sigma_w^2)$ , where  $\mu_w$  and  $\sigma_w$  are the mean and standard deviation of  $p(w)$  respectively.*

*Proof.*

$$\mathbb{E}_{p(w)}(\|\mathbf{w}\|^2) = \mathbb{E}_{p(w)}\left(\sum_{i=1}^M w_i^2\right) \quad (13)$$

$$= \sum_{i=1}^M \mathbb{E}_{p(w)}(w_i^2) \quad (14)$$

$$= \sum_{i=1}^M \mu_w^2 + \sigma_w^2 \quad (15)$$

$$= M \cdot (\mu_w^2 + \sigma_w^2) \quad (16)$$

□

**Lemma S.2.** *Consider a linear function with scalar output  $z = \mathbf{w}^T \mathbf{x}$  where  $\mathbf{w} \in \mathbb{R}^{M \times 1}$  is the vector of weights with components  $w_i, i \in \{1, \dots, M\}$ ,  $\mathbf{x} \in \mathbb{R}^{M \times 1}$  are the input features. Moreover, consider the weights are independently and identically distributed  $w_i \sim p(w)$ . The expected value of the norm of the output is given by  $\mathbb{E}_{p(w)}(\|\mathbf{w}^T \mathbf{x}\|^2) = (\mu_w^2 + \sigma_w^2) \cdot \|\mathbf{x}\|^2 + \mu_w^2 \cdot \sum_{i=1}^M \sum_{j=1}^{i-1} x_i \cdot x_j$ .*

*Proof.*

$$\mathbb{E}_{p(w)}((\mathbf{w}^T \mathbf{x})^2) = \mathbb{E}_{p(w)}\left(\left(\sum_{i=1}^M w_i \cdot x_i\right)^2\right) \quad (17)$$

$$= \mathbb{E}_{p(w)}\left(\sum_{i=1}^M (w_i \cdot x_i)^2 + \sum_{i=1}^M \sum_{j=1}^{i-1} w_i \cdot w_j \cdot x_i \cdot x_j\right) \quad (18)$$

$$= \sum_{i=1}^M \mathbb{E}_{p(w)}(w_i^2) \cdot x_i^2 + 2 \cdot \sum_{i=1}^M \sum_{j=1}^{i-1} \mathbb{E}_{p(w)}(w_i \cdot w_j) \cdot x_i \cdot x_j \quad (19)$$

$$(20)$$

Since  $w_i, w_j$  are independent then  $\mathbb{E}_{p(w)}(w_i \cdot w_j) = \mathbb{E}_{p(w)}(w_i) \cdot \mathbb{E}_{p(w)}(w_j) = \mu_w^2$ . Moreover, with a slight abuse in notation, we denote  $\sum_{i=1}^M \sum_{j=1}^{i-1} x_i \cdot x_j = \mathbf{x} \otimes \mathbf{x}$ . Given lemma S.1, we obtain:

$$\mathbb{E}_{p(w)}((\mathbf{w}^T \mathbf{x})^2) = (\mu_w^2 + \sigma_w^2) \cdot \|\mathbf{x}\|^2 + 2 \cdot \mu_w^2 \cdot \mathbf{x} \otimes \mathbf{x} = D_w(\mathbf{x}) \quad (21)$$

$$(22)$$

where  $D_w(\cdot)$  is introduced as an operation to simplify the notation.  $\square$

**Proposition S.3.** Consider two vectors  $\mathbf{x}', \hat{\mathbf{x}} \in \mathbb{R}^M$ , and two weight vectors  $\hat{\mathbf{w}}$  and  $\mathbf{w}'$ ,  $\hat{\mathbf{w}}^T \hat{\mathbf{x}} \in \mathbb{R}, \mathbf{w}'^T \mathbf{x}' \in \mathbb{R}$ , such that the weights are iid. Then  $\mathbb{E}_{p(w)}((\hat{\mathbf{w}}^T \hat{\mathbf{x}} - \mathbf{w}'^T \mathbf{x}')^2) > \mathbb{E}_{p(w)}((\hat{\mathbf{w}}^T \hat{\mathbf{x}} - \hat{\mathbf{w}}^T \mathbf{x}')^2)$ .

*Proof.* Using lemma S.2 and decomposition the argument within square:

$$\mathbb{E}_{p(w)}((\hat{\mathbf{w}}^T \hat{\mathbf{x}} - \mathbf{w}'^T \mathbf{x}')^2) = \mathbb{E}_{p(w)}\left((\hat{\mathbf{w}}^T \hat{\mathbf{x}})^2 + (\mathbf{w}'^T \mathbf{x}')^2 - 2 \cdot \hat{\mathbf{w}}^T \hat{\mathbf{x}} \cdot \mathbf{w}'^T \mathbf{x}'\right) \quad (23)$$

$$= D_w(\hat{\mathbf{x}}) + D_w(\mathbf{x}') - 2 \cdot \mathbb{E}_{p(w)}(\hat{\mathbf{w}}^T \hat{\mathbf{x}} \cdot \mathbf{w}'^T \mathbf{x}') \quad (24)$$

$$= D_w(\hat{\mathbf{x}}) + D_w(\mathbf{x}') - 2 \cdot \mathbb{E}_{p(w)}\left(\sum_{i=1}^{\hat{M}} \hat{w}_i \cdot \hat{x}_i \sum_{j=1}^{M'} w_j' \cdot x_j'\right) \quad (25)$$

$$= D_w(\hat{\mathbf{x}}) + D_w(\mathbf{x}') - 2 \cdot \mathbb{E}_{p(w)}\left(\sum_{i=1}^{\hat{M}} \sum_{j=1}^{M'} w_j' \cdot x_j' \cdot \hat{w}_i \cdot \hat{x}_i\right) \quad (26)$$

$$= D_w(\hat{\mathbf{x}}) + D_w(\mathbf{x}') - 2 \cdot \sum_{i=1}^{\hat{M}} \sum_{j=1}^{M'} \mathbb{E}_{p(w)}(w_j' \cdot \hat{w}_i) \cdot x_j' \cdot \hat{x}_i \quad (27)$$

Since  $\hat{\mathbf{w}}$  and  $\mathbf{w}'$  are independent, then  $\mathbb{E}_{p(w)}(w_j' \cdot \hat{w}_i) = \mathbb{E}_{p(w)}(w_j') \cdot \mathbb{E}_{p(w)}(\hat{w}_i) = \mu_w^2$ . Thus,

$$\mathbb{E}_{p(w)}((\hat{\mathbf{w}}^T \hat{\mathbf{x}} - \mathbf{w}'^T \mathbf{x}')^2) = D_w(\hat{\mathbf{x}}) + D_w(\mathbf{x}') - 2 \cdot \mu_w^2 \cdot \sum_{i=1}^{\hat{M}} \sum_{j=1}^{M'} x_j' \cdot \hat{x}_i \quad (28)$$

When computing  $\mathbb{E}_{p(w)}((\hat{\mathbf{w}}^T \hat{\mathbf{x}} - \hat{\mathbf{w}}^T \mathbf{x}')^2)$ , we see that the weights are not independent, thus  $\mathbb{E}_{p(w)}(\hat{w}_i \cdot \hat{w}_i) = \mu_w^2 + \sigma_w^2$ , and

$$\mathbb{E}_{p(w)}((\hat{w}^T \hat{x} - \hat{w}^T x')^2) = D_w(\hat{x}) + D_w(x') - 2 \cdot (\mu_w^2 + \sigma_w^2) \cdot \sum_{i=1}^{\hat{M}} \sum_{j=1}^{M'} x'_j \cdot \hat{x}_i \quad (29)$$

$$< D_w(\hat{x}) + D_w(x') - 2 \cdot \mu_w^2 \cdot \sum_{i=1}^{\hat{M}} \sum_{j=1}^{M'} x'_j \cdot \hat{x}_i \quad (30)$$

$$< \mathbb{E}_{p(w)}((\hat{w}^T \hat{x} - w'^T x')^2) \quad (31)$$

□

**Corollary S.4.** *A random initialized DeepPipe with encoder layers induces an assumption that two hyperparameter configurations of an algorithm should have more similar performance than hyperparameter configurations from different algorithms.*

*Proof.* Given two hyperparameter configurations  $\lambda^{(l)}, \lambda^{(m)}$  from an algorithm, and a third hyperparameter configuration  $\lambda^{(n)}$  from a different algorithm, every random initialized encoder layer from *DeepPipe* maps the hyperparameters  $\lambda^{(l)}, \lambda^{(m)}$  to latent dimensions  $z^{(l)}, z^{(m)}$  that are closer to each other than to  $z^{(n)}$ , i.e. the expected distance among the output of the encoder layer will be  $\mathbb{E}_{p(w)}(\|z^{(l)} - z^{(m)}\|) < \mathbb{E}_{p(w)}(\|z^{(l)} - z^{(n)}\|)$  based on Proposition S.3. Since *DeepPipe* uses a kernel such that  $\kappa(x, x') = \kappa(x - x')$ , their similarity will increase, when the distance between two configurations decreases. Thus, according to the Equation 2, they will have correlated performance. □

## T META-DATASET SPLITS

We specify the IDs of the task used per split. The ID of the tasks are taken from the original meta-dataset creators.

### (i) PMF Meta-Dataset

**Meta-training:** 4538, 824, 1544, 1082, 1126, 917, 1153, 1063, 722, 1145, 1106, 1454, 4340, 477, 938, 806, 866, 333, 995, 1125, 924, 298, 755, 336, 820, 1471, 1120, 1520, 1569, 829, 958, 997, 472, 1442, 1122, 868, 313, 928, 921, 1446, 1536, 1025, 4534, 480, 723, 835, 1081, 950, 300, 1162, 821, 469, 933, 343, 766, 936, 1568, 785, 31, 164, 395, 761, 1534, 1056, 685, 1459, 230, 867, 828, 161, 742, 1136, 385, 877, 11, 1066, 1532, 1533, 941, 468, 1542, 795, 329, 792, 782, 1131, 796, 4153, 448, 1508, 1065, 1046, 1014, 54, 780, 748, 1150, 793, 1441, 1531, 717, 819, 1151, 287, 1016, 4135, 874, 162, 1148, 1005, 956, 1528, 23, 1516, 446, 1567, 41, 729, 910, 1156, 32, 1041, 1501, 955, 1129, 827, 937, 180, 1038, 973, 36, 44, 1496, 855, 400, 754, 1557, 1413, 758, 817, 1563, 181, 1127, 43, 444, 277, 1141, 715, 725, 884, 790, 880, 853, 155, 223, 1529, 1535, 6, 1009, 744, 1107, 1158, 830, 859, 947, 1475, 813, 734, 976, 227, 1137, 762, 777, 751, 784, 886, 885, 843, 1055, 1486, 1237, 225, 39, 778, 721, 392, 312, 857, 457, 1450, 209, 779, 479, 718, 801, 770, 1049, 391, 12, 730, 759, 1013, 338, 719, 988, 974, 787, 60, 741, 865, 1050, 735, 1079, 1482, 1143, 954, 1020, 1236, 814, 1048, 892, 879, 745, 971, 913, 1152, 694, 1133, 765, 905, 804, 848, 40477, 846, 334, 791, 923, 377, 1530, 889, 1163, 1006, 749, 922, 10, 59, 1541, 310, 461, 1538, 398, 870, 1481, 970, 1036, 1044, 1068, 187, 476, 1157, 40478, 1124, 1045, 845, 62, 915, 1167, 1059, 458, 815, 28, 797, 462, 21, 952, 467, 1505, 375, 882, 1011, 1460, 964, 1104, 275, 732, 189, 478, 1464, 979, 40474, 772, 720, 1022, 823, 811, 463, 61, 1451, 1067, 1165, 184, 716, 962, 978, 916, 1217, 935, 900, 925, 919, 871, 808, 335, 1457, 799, 983, 1169, 1004, 837, 1507, 4134, 890, 1062, 1510, 818, 728, 1135, 1147, 1019, 450, 1561, 40476, 816, 1562, 740, 864, 942, 151, 713, 953, 737, 1115, 1123, 1545, 1498, 850, 873, 959, 951, 987, 991, 1132, 1154, 294, 1040, 894, 26, 878, 307, 881, 746, 679, 872, 863, 943, 18, 1537, 767, 794, 1121, 1448, 401, 14, 1026, 833, 875, 1488, 383, 914, 20, 1043, 1116, 292, 847, 1540, 1069, 1155, 1015, 1238, 1149, 1546, 841, 1565, 1556, 1527, 682, 465, 1144, 769, 1517, 756, 834, 912, 807, 904, 16, 1061, 386, 805, 3, 775, 464, 50, 1455, 1021, 1160, 1140, 1489, 1519, 946, 994, 46, 22, 1443, 339, 969, 965, 30, 977, 860, 1500, 1064, 776, 822, 182, 743, 934, 1060, 803, 980, 1539, 346, 788, 1444, 1467, 727, 1509, 903, 832.

**Meta-Test:** 906, 789, 1159, 1600, 48, 1453, 876, 929, 1012, 891, 1164, 726, 459, 37, 812, 909, 927, 774, 278, 279, 1054, 918, 763, 394, 948, 40, 1100, 736, 1503, 1071, 1512, 1483, 53, 869, 285, 773,



1518, 197, 926, 836, 826, 907, 920, 1080, 1412, 276, 764, 945, 1543, 1472, 996, 908, 896, 851, 397, 783, 1084, 731, 888, 733, 1473, 753, 683, 893, 825, 902, 750, 1078, 8, 1073, 1077, 475, 724, 1513, 384, 388, 887, 714, 771, 1117, 1487, 337, 1447, 862, 838, 949, 800, 931, 911.

**Meta-Validation:** 1075, 747, 901, 1452, 389, 387, 752, 932, 768, 40475, 849, 1564, 1449, 895, 183.

## (ii) TensorOBOE Meta-Dataset

**Meta-Training** 210, 20, 491, 339, 14, 170, 483, 284, 543, 220, 493, 64, 524, 485, 120, 81, 495, 362, 243, 545, 538, 532, 160, 541, 238, 436, 320, 272, 497, 412, 51, 195, 191, 116, 345, 400, 164, 106, 376, 63, 105, 308, 523, 490, 319, 93, 468, 517, 198, 145, 150, 39, 502, 364, 253, 303, 471, 2, 221, 518, 146, 241, 457, 114, 372, 176, 168, 536, 350, 338, 136, 416, 254, 337, 311, 464, 424, 255, 232, 133, 33, 88, 290, 44, 61, 199, 492, 529, 500, 343, 218, 302, 297, 73, 295, 35, 344, 29, 432, 410, 417, 309, 527, 217, 27, 402, 351, 156, 403, 414, 138, 212, 104, 438, 415, 421, 215, 466, 189, 214, 508, 204, 234, 259, 67, 24, 216, 300, 223, 129, 458, 111, 166, 505, 477, 40, 274, 427, 79, 375, 380, 327, 13, 287, 326, 496, 251, 228, 420, 161, 83, 117, 25, 110, 149, 152, 16, 407, 331, 109, 441, 422, 139, 237, 260, 352, 428, 317, 323, 484, 248, 449, 467, 19, 328, 296, 454, 269, 363, 226, 465, 3, 542, 125, 280, 286, 77, 184, 371, 455, 540, 275, 294, 521, 182, 32, 80, 307, 258, 11, 360, 447, 86, 266, 36, 193, 58, 41, 270, 411, 50, 209, 481, 480, 504, 503, 123, 222, 419, 62, 456, 377, 130, 187, 23, 451, 479, 43, 370, 394, 0, 383, 201, 405, 368, 515, 98, 387, 349, 304, 418, 292, 178, 369, 256, 94, 197, 95, 535, 163, 169, 69, 305, 48, 341, 373, 397, 207, 279, 514, 227, 148, 143, 334, 180, 356, 460, 131, 127, 47, 452, 262, 324, 203, 84, 426, 121, 544, 520, 534, 398, 384, 91, 82, 430, 267, 119, 358, 291, 57, 425, 487, 321, 257, 442, 42, 388, 335, 273, 488, 53, 522, 128, 28, 183, 459, 510, 151, 244, 265, 288, 423, 147, 177, 99, 448, 431, 115, 72, 537, 174, 87, 486, 314, 396, 472, 70, 277, 9, 359, 192

**Meta-Test** 118, 159, 548, 453, 385, 31, 512, 353, 247, 179, 332, 379, 10, 489, 112, 293, 219, 395, 281, 65, 409, 126, 401, 526, 342, 346, 413, 137, 366, 7, 381, 506, 289, 539, 282, 101, 97, 278, 54, 30, 298, 49, 100, 474, 461, 322, 283, 56, 144, 60, 6, 8, 507, 310, 336, 225, 261, 38, 329, 365, 445, 429, 513, 188, 469, 124, 154, 340, 59, 312, 473, 498, 546, 528, 263, 194, 55, 171, 236, 206, 158, 196, 34, 408, 18, 501, 250, 533, 52, 74, 26, 173, 92, 167, 4, 382, 181, 208, 354, 249, 450, 5, 141, 525, 200, 135, 531, 122, 22, 68

**Meta-Validation** 85, 446, 96, 172, 134, 37, 392, 90, 509, 389, 378, 435, 66, 391, 530, 333, 462, 231, 330, 301, 325, 268, 434, 318, 233, 213, 549, 140, 264, 482, 155, 235, 175, 157, 113, 165, 245, 246, 15, 361, 547, 470, 17, 306, 190, 153, 357, 45, 443, 162, 475, 186, 224, 494, 393, 399, 444, 550, 439, 516, 433, 230, 108, 89, 406, 46, 102, 463, 21, 107, 374, 211, 103, 71, 75, 316, 78, 240, 205, 386, 202, 142, 313, 252, 348, 511, 437, 347, 478, 355, 476, 242, 276, 519, 499, 285, 271, 229, 1, 390, 12, 132, 299, 404, 440, 239, 185, 76, 367, 315

## (iii) ZAP Meta-Dataset

**Meta-Train** 0-svhn\_cropped, 1-svhn\_cropped, 2-svhn\_cropped, 3-svhn\_cropped, 4-svhn\_cropped, 5-svhn\_cropped, 6-svhn\_cropped, 7-svhn\_cropped, 8-svhn\_cropped, 9-svhn\_cropped, 10-svhn\_cropped, 11-svhn\_cropped, 12-svhn\_cropped, 13-svhn\_cropped, 14-svhn\_cropped, 0-cycle\_gan\_apple2orange, 1-cycle\_gan\_apple2orange, 2-cycle\_gan\_apple2orange, 3-cycle\_gan\_apple2orange, 4-cycle\_gan\_apple2orange, 5-cycle\_gan\_apple2orange, 6-cycle\_gan\_apple2orange, 7-cycle\_gan\_apple2orange, 8-cycle\_gan\_apple2orange, 9-cycle\_gan\_apple2orange, 10-cycle\_gan\_apple2orange, 11-cycle\_gan\_apple2orange, 12-cycle\_gan\_apple2orange, 13-cycle\_gan\_apple2orange, 14-cycle\_gan\_apple2orange, 0-cats\_vs\_dogs, 1-cats\_vs\_dogs, 2-cats\_vs\_dogs, 3-cats\_vs\_dogs, 4-cats\_vs\_dogs, 5-cats\_vs\_dogs, 6-cats\_vs\_dogs, 7-cats\_vs\_dogs, 8-cats\_vs\_dogs, 9-cats\_vs\_dogs, 10-cats\_vs\_dogs, 11-cats\_vs\_dogs, 12-cats\_vs\_dogs, 13-cats\_vs\_dogs, 14-cats\_vs\_dogs, 0-stanford\_dogs, 1-stanford\_dogs, 2-stanford\_dogs, 3-stanford\_dogs, 4-stanford\_dogs, 5-stanford\_dogs, 6-stanford\_dogs, 7-stanford\_dogs, 8-stanford\_dogs, 9-stanford\_dogs, 10-stanford\_dogs, 11-stanford\_dogs, 12-stanford\_dogs, 13-stanford\_dogs, 14-stanford\_dogs, 0-cifar100, 1-cifar100, 2-cifar100, 3-cifar100, 4-cifar100, 5-cifar100, 6-cifar100, 7-cifar100, 8-cifar100, 9-cifar100, 10-cifar100, 11-cifar100, 12-cifar100, 13-cifar100, 14-cifar100, 0-coil100, 1-coil100, 2-coil100, 3-coil100, 4-coil100, 5-coil100, 6-coil100, 7-coil100, 8-coil100, 9-coil100, 10-coil100, 11-coil100, 12-coil100, 13-coil100, 14-coil100, 0-omniglot, 1-omniglot, 2-omniglot, 3-omniglot, 4-omniglot, 5-omniglot, 6-omniglot, 7-omniglot, 8-omniglot, 9-omniglot, 10-omniglot, 11-omniglot, 12-omniglot, 13-omniglot, 14-omniglot, 0-cars196, 1-cars196, 2-cars196, 3-cars196, 4-cars196, 5-cars196, 6-cars196, 7-cars196, 8-cars196, 9-cars196, 10-cars196, 11-cars196, 12-cars196, 13-cars196,

14-cars196, 0-horses\_or\_humans, 1-horses\_or\_humans, 2-horses\_or\_humans, 3-horses\_or\_humans, 4-horses\_or\_humans, 5-horses\_or\_humans, 6-horses\_or\_humans, 7-horses\_or\_humans, 8-horses\_or\_humans, 9-horses\_or\_humans, 10-horses\_or\_humans, 11-horses\_or\_humans, 12-horses\_or\_humans, 13-horses\_or\_humans, 14-horses\_or\_humans, 0-tf\_flowers, 1-tf\_flowers, 2-tf\_flowers, 3-tf\_flowers, 4-tf\_flowers, 5-tf\_flowers, 6-tf\_flowers, 7-tf\_flowers, 8-tf\_flowers, 9-tf\_flowers, 10-tf\_flowers, 11-tf\_flowers, 12-tf\_flowers, 13-tf\_flowers, 14-tf\_flowers, 0-cycle\_gan\_maps, 1-cycle\_gan\_maps, 2-cycle\_gan\_maps, 3-cycle\_gan\_maps, 4-cycle\_gan\_maps, 5-cycle\_gan\_maps, 6-cycle\_gan\_maps, 7-cycle\_gan\_maps, 8-cycle\_gan\_maps, 9-cycle\_gan\_maps, 10-cycle\_gan\_maps, 11-cycle\_gan\_maps, 12-cycle\_gan\_maps, 13-cycle\_gan\_maps, 14-cycle\_gan\_maps, 0-rock\_paper\_scissors, 1-rock\_paper\_scissors, 2-rock\_paper\_scissors, 3-rock\_paper\_scissors, 4-rock\_paper\_scissors, 5-rock\_paper\_scissors, 6-rock\_paper\_scissors, 7-rock\_paper\_scissors, 8-rock\_paper\_scissors, 9-rock\_paper\_scissors, 10-rock\_paper\_scissors, 11-rock\_paper\_scissors, 12-rock\_paper\_scissors, 13-rock\_paper\_scissors, 14-rock\_paper\_scissors, 0-cassava, 1-cassava, 2-cassava, 3-cassava, 4-cassava, 5-cassava, 6-cassava, 7-cassava, 8-cassava, 9-cassava, 10-cassava, 11-cassava, 12-cassava, 13-cassava, 14-cassava, 0-cmaterdb\_devanagari, 1-cmaterdb\_devanagari, 2-cmaterdb\_devanagari, 3-cmaterdb\_devanagari, 4-cmaterdb\_devanagari, 5-cmaterdb\_devanagari, 6-cmaterdb\_devanagari, 7-cmaterdb\_devanagari, 8-cmaterdb\_devanagari, 9-cmaterdb\_devanagari, 10-cmaterdb\_devanagari, 11-cmaterdb\_devanagari, 12-cmaterdb\_devanagari, 13-cmaterdb\_devanagari, 14-cmaterdb\_devanagari, 0-cycle\_gan\_vangogh2photo, 1-cycle\_gan\_vangogh2photo, 2-cycle\_gan\_vangogh2photo, 3-cycle\_gan\_vangogh2photo, 4-cycle\_gan\_vangogh2photo, 5-cycle\_gan\_vangogh2photo, 6-cycle\_gan\_vangogh2photo, 7-cycle\_gan\_vangogh2photo, 8-cycle\_gan\_vangogh2photo, 9-cycle\_gan\_vangogh2photo, 10-cycle\_gan\_vangogh2photo, 11-cycle\_gan\_vangogh2photo, 12-cycle\_gan\_vangogh2photo, 13-cycle\_gan\_vangogh2photo, 14-cycle\_gan\_vangogh2photo, 0-cycle\_gan\_ukiyoe2photo, 1-cycle\_gan\_ukiyoe2photo, 2-cycle\_gan\_ukiyoe2photo, 3-cycle\_gan\_ukiyoe2photo, 4-cycle\_gan\_ukiyoe2photo, 5-cycle\_gan\_ukiyoe2photo, 6-cycle\_gan\_ukiyoe2photo, 7-cycle\_gan\_ukiyoe2photo, 8-cycle\_gan\_ukiyoe2photo, 9-cycle\_gan\_ukiyoe2photo, 10-cycle\_gan\_ukiyoe2photo, 11-cycle\_gan\_ukiyoe2photo, 12-cycle\_gan\_ukiyoe2photo, 13-cycle\_gan\_ukiyoe2photo, 14-cycle\_gan\_ukiyoe2photo, 0-cifar10, 1-cifar10, 2-cifar10, 3-cifar10, 4-cifar10, 5-cifar10, 6-cifar10, 7-cifar10, 8-cifar10, 9-cifar10, 10-cifar10, 11-cifar10, 12-cifar10, 13-cifar10, 14-cifar10, 0-cmaterdb\_bangla, 1-cmaterdb\_bangla, 2-cmaterdb\_bangla, 3-cmaterdb\_bangla, 4-cmaterdb\_bangla, 5-cmaterdb\_bangla, 6-cmaterdb\_bangla, 7-cmaterdb\_bangla, 8-cmaterdb\_bangla, 9-cmaterdb\_bangla, 10-cmaterdb\_bangla, 11-cmaterdb\_bangla, 12-cmaterdb\_bangla, 13-cmaterdb\_bangla, 14-cmaterdb\_bangla, 0-cycle\_gan\_iphone2dslr\_flower, 1-cycle\_gan\_iphone2dslr\_flower, 2-cycle\_gan\_iphone2dslr\_flower, 3-cycle\_gan\_iphone2dslr\_flower, 4-cycle\_gan\_iphone2dslr\_flower, 5-cycle\_gan\_iphone2dslr\_flower, 6-cycle\_gan\_iphone2dslr\_flower, 7-cycle\_gan\_iphone2dslr\_flower, 8-cycle\_gan\_iphone2dslr\_flower, 9-cycle\_gan\_iphone2dslr\_flower, 10-cycle\_gan\_iphone2dslr\_flower, 11-cycle\_gan\_iphone2dslr\_flower, 12-cycle\_gan\_iphone2dslr\_flower, 13-cycle\_gan\_iphone2dslr\_flower, 14-cycle\_gan\_iphone2dslr\_flower, 0-emnist\_mnist, 1-emnist\_mnist, 2-emnist\_mnist, 3-emnist\_mnist, 4-emnist\_mnist, 5-emnist\_mnist, 6-emnist\_mnist, 7-emnist\_mnist, 8-emnist\_mnist, 9-emnist\_mnist, 10-emnist\_mnist, 11-emnist\_mnist, 12-emnist\_mnist, 13-emnist\_mnist, 14-emnist\_mnist, 0-eurosat\_rgb, 1-eurosat\_rgb, 2-eurosat\_rgb, 3-eurosat\_rgb, 4-eurosat\_rgb, 5-eurosat\_rgb, 6-eurosat\_rgb, 7-eurosat\_rgb, 8-eurosat\_rgb, 9-eurosat\_rgb, 10-eurosat\_rgb, 11-eurosat\_rgb, 12-eurosat\_rgb, 13-eurosat\_rgb, 14-eurosat\_rgb, 0-colorectal\_histology, 1-colorectal\_histology, 2-colorectal\_histology, 3-colorectal\_histology, 4-colorectal\_histology, 5-colorectal\_histology, 6-colorectal\_histology, 7-colorectal\_histology, 8-colorectal\_histology, 9-colorectal\_histology, 10-colorectal\_histology, 11-colorectal\_histology, 12-colorectal\_histology, 13-colorectal\_histology, 14-colorectal\_histology, 0-cmaterdb\_telugu, 1-cmaterdb\_telugu, 2-cmaterdb\_telugu, 3-cmaterdb\_telugu, 4-cmaterdb\_telugu, 5-cmaterdb\_telugu, 6-cmaterdb\_telugu, 7-cmaterdb\_telugu, 8-cmaterdb\_telugu, 9-cmaterdb\_telugu, 10-cmaterdb\_telugu, 11-cmaterdb\_telugu, 12-cmaterdb\_telugu, 13-cmaterdb\_telugu, 14-cmaterdb\_telugu, 0-uc\_merced, 1-uc\_merced, 2-uc\_merced, 3-uc\_merced, 4-uc\_merced, 5-uc\_merced, 6-uc\_merced, 7-uc\_merced, 8-uc\_merced, 9-uc\_merced, 10-uc\_merced, 11-uc\_merced, 12-uc\_merced, 13-uc\_merced, 14-uc\_merced, 0-kmnist, 1-kmnist, 2-kmnist, 3-kmnist, 4-kmnist, 5-kmnist, 6-kmnist, 7-kmnist, 8-kmnist, 9-kmnist, 10-kmnist, 11-kmnist, 12-kmnist, 13-kmnist, 14-kmnist

**Meta-Test** 0-cycle\_gan\_summer2winter\_yosemite, 1-cycle\_gan\_summer2winter\_yosemite, 2-cycle\_gan\_summer2winter\_yosemite, 3-cycle\_gan\_summer2winter\_yosemite, 4-cycle\_gan\_summer2winter\_yosemite, 5-cycle\_gan\_summer2winter\_yosemite, 6-

cycle\_gan\_summer2winter\_yosemite, 7-cycle\_gan\_summer2winter\_yosemite, 8-  
 cycle\_gan\_summer2winter\_yosemite, 9-cycle\_gan\_summer2winter\_yosemite, 10-  
 cycle\_gan\_summer2winter\_yosemite, 11-cycle\_gan\_summer2winter\_yosemite, 12-  
 cycle\_gan\_summer2winter\_yosemite, 13-cycle\_gan\_summer2winter\_yosemite, 14-  
 cycle\_gan\_summer2winter\_yosemite, 0-malaria, 1-malaria, 2-malaria, 3-malaria, 4-malaria,  
 5-malaria, 6-malaria, 7-malaria, 8-malaria, 9-malaria, 10-malaria, 11-malaria, 12-malaria,  
 13-malaria, 14-malaria, 0-cycle\_gan\_facades, 1-cycle\_gan\_facades, 2-cycle\_gan\_facades,  
 3-cycle\_gan\_facades, 4-cycle\_gan\_facades, 5-cycle\_gan\_facades, 6-cycle\_gan\_facades, 7-  
 cycle\_gan\_facades, 8-cycle\_gan\_facades, 9-cycle\_gan\_facades, 10-cycle\_gan\_facades, 11-  
 cycle\_gan\_facades, 12-cycle\_gan\_facades, 13-cycle\_gan\_facades, 14-cycle\_gan\_facades,  
 0-ernnist\_balanced, 1-ernnist\_balanced, 2-ernnist\_balanced, 3-ernnist\_balanced, 4-ernnist\_balanced,  
 5-ernnist\_balanced, 6-ernnist\_balanced, 7-ernnist\_balanced, 8-ernnist\_balanced, 9-ernnist\_balanced,  
 10-ernnist\_balanced, 11-ernnist\_balanced, 12-ernnist\_balanced, 13-ernnist\_balanced, 14-  
 ernnist\_balanced, 0-imagenette, 1-imagenette, 2-imagenette, 3-imagenette, 4-imagenette,  
 5-imagenette, 6-imagenette, 7-imagenette, 8-imagenette, 9-imagenette, 10-imagenette, 11-  
 imagenette, 12-imagenette, 13-imagenette, 14-imagenette, 0-mnist, 1-mnist, 2-mnist, 3-mnist,  
 4-mnist, 5-mnist, 6-mnist, 7-mnist, 8-mnist, 9-mnist, 10-mnist, 11-mnist, 12-mnist, 13-mnist,  
 14-mnist, 0-cycle\_gan\_horse2zebra, 1-cycle\_gan\_horse2zebra, 2-cycle\_gan\_horse2zebra,  
 3-cycle\_gan\_horse2zebra, 4-cycle\_gan\_horse2zebra, 5-cycle\_gan\_horse2zebra, 6-  
 cycle\_gan\_horse2zebra, 7-cycle\_gan\_horse2zebra, 8-cycle\_gan\_horse2zebra, 9-  
 cycle\_gan\_horse2zebra, 10-cycle\_gan\_horse2zebra, 11-cycle\_gan\_horse2zebra, 12-  
 cycle\_gan\_horse2zebra, 13-cycle\_gan\_horse2zebra, 14-cycle\_gan\_horse2zebra

**Meta-Validation** 0-ernnist\_byclass, 1-ernnist\_byclass, 2-ernnist\_byclass, 3-ernnist\_byclass,  
 4-ernnist\_byclass, 5-ernnist\_byclass, 6-ernnist\_byclass, 7-ernnist\_byclass, 8-ernnist\_byclass,  
 9-ernnist\_byclass, 10-ernnist\_byclass, 11-ernnist\_byclass, 12-ernnist\_byclass, 13-ernnist\_byclass, 14-  
 ernnist\_byclass, 0-imagenet\_resized\_32x32, 1-imagenet\_resized\_32x32, 2-imagenet\_resized\_32x32,  
 3-imagenet\_resized\_32x32, 4-imagenet\_resized\_32x32, 5-imagenet\_resized\_32x32, 6-  
 imagenet\_resized\_32x32, 7-imagenet\_resized\_32x32, 8-imagenet\_resized\_32x32, 9-  
 imagenet\_resized\_32x32, 10-imagenet\_resized\_32x32, 11-imagenet\_resized\_32x32, 12-  
 imagenet\_resized\_32x32, 13-imagenet\_resized\_32x32, 14-imagenet\_resized\_32x32, 0-  
 fashion\_mnist, 1-fashion\_mnist, 2-fashion\_mnist, 3-fashion\_mnist, 4-fashion\_mnist, 5-fashion\_mnist,  
 6-fashion\_mnist, 7-fashion\_mnist, 8-fashion\_mnist, 9-fashion\_mnist, 10-fashion\_mnist, 11-  
 fashion\_mnist, 12-fashion\_mnist, 13-fashion\_mnist, 14-fashion\_mnist

#### (iv) OpenML Datasets

10101, 12, 146195, 146212, 146606, 146818, 146821, 146822, 146825, 14965, 167119, 167120,  
 168329, 168330, 168331, 168332, 168335, 168337, 168338, 168868, 168908, 168909, 168910,  
 168911, 168912, 189354, 189355, 189356, 3, 31, 34539, 3917, 3945, 53, 7592, 7593, 9952, 9977,  
 9981

We checked that there is not overlap between the tasks used for meta-training from the TensorOBOE  
 and the tasks used on OpenML Datasets.
